# Supplementary material
Source: publisher site journal article supplement (https://www.degruyterbrill.com/publication/journal_key/NANOPH/downloadAsset/NANOPH_LaTeX_Article_Template.zip)
Supplement: Supplementary file 4 [file NANOPH_LaTeX_Article_Template.zip]

## Research Article

First author, Second author, and Third author\*

# Article title

**Abstract:** Abstract text. If citations are necessary, use the complete reference in the abstract.

**Keywords:** keyword 1; keyword 2; keyword 3

**Dedicated to** our professor, Dr. Firstname Lastname, whose critique of the underlying study identified potential bias in the analysis and strengthened our argument.

## 1 Introduction

Found a journal in which you would like to publish? Then we suggest going to the journal's website (<https://www.degruyter.com/nanoph>) and reading the [Instructions for authors](#) (PDF) or <https://www.degruyter.com/journal/key/nanoph/html#submit> online. Please follow our specifications and guidance when creating and formatting your manuscript.

All submissions to *Nanophotonics* should be made via the online system ScholarOne – <https://mc.manuscriptcentral.com/nanoph>. Submitting your article online saves you time and speeds up the publication process.

### 1.1 General information

Manuscripts should be written in clear and concise English. Please have your text proofread by an English native speaker before you submit it for consideration. At the proof stage, only minor changes and corrections are allowed.

The **Introduction** to the manuscript should contain a clear definition of the problem being considered. Wherever possible, theoretical results should be cited. The use of SI units is required.

## 2 Layout of manuscripts

### 2.1 Equations and theorem-like environments

**Equations** should be well-aligned and should not be crowded (1). Only Latin and Greek alphabets are to be

used. Complicated superscripts and subscripts should be avoided by introducing new symbols. Avoid repetition of a complicated expression by representing it with a symbol.

$$k_{n+1} = n^2 + k_n^2 - k_{n-1}$$

$$f(x) = (x + a)(x + b) \quad (1)$$

New theorem-like environments will be introduced by using the commands `\theoremstyle` and `\newtheorem`. Please note that the environments `proof` and `definition` are already defined within `dgruyter.sty`.

**Definition 1.** This is a definition environment.

**Theorem 1.** *This is a theorem environment.*

*Proof.* This is a proof environment. □

### 2.2 Figures and Tables

The number of **Figures** should be limited to the absolute minimum. Images must be of good contrast and sufficiently high resolution for reproduction (minimum 600 dpi). Lettering of all figures should be uniform in style. Authors are encouraged to submit illustrations in color if necessary for their scientific content.

When drawing bar graphs, use patterning/color instead of grey scales (faint shading may be lost upon reproduction). Each figure should be uploaded separately as .jpg-, .eps-, .pdf- or .tiff-file. The legends for the figures must be concise and self-explanatory. The key to the symbols in the figures should be included in the figure where possible. Otherwise, they should be included in the legend.

A concise, self-explanatory caption should appear below **Figures** and above **Tables**, accordingly. Each table should be placed on a separate manuscript page including its caption. All figures and tables should be numbered and referred to in your document as Table 1 or Figure 1 (e.g. “See Table 1”, “As Figure 1 indicates” etc.).

All figures and tables should be left aligned as required by the journal style.

---

**First author**, University, City, Country, e-mail; ORCID

**Second author**, University, City, Country, e-mail; ORCID

**\*Corresponding author: Third author**, University, City, Country, e-mail; ORCID

**Tab. 1:** Sample table with header.

| Table head 1 | Table head 2 | Table head 3 |
|--------------|--------------|--------------|
| 10           | 40           | text A       |
| 20           | 50           | text B       |
| 30           | 60           | text C       |

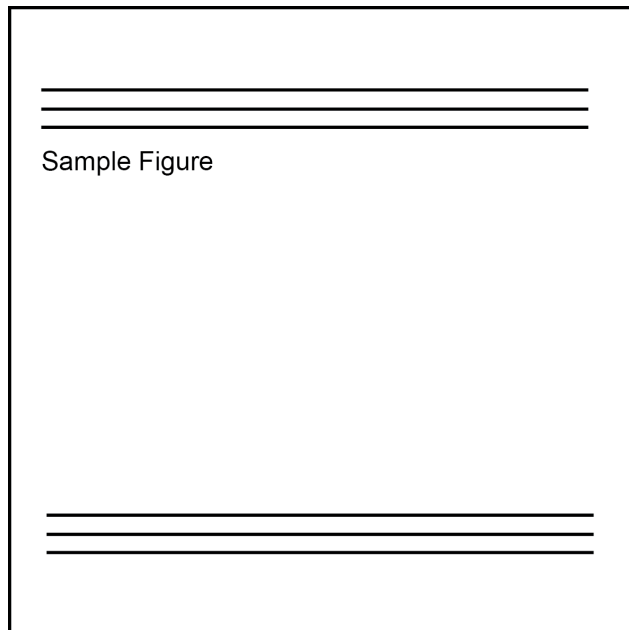**Fig. 1:** A figure caption should be placed below Figure 1.**Tab. 2:** Sample table without header.

| First column | Second column | Third column | Fourth column |
|--------------|---------------|--------------|---------------|
| 1            | 2             | 3            | 4             |
| 5            | 6             | 7            | 8             |
| 9            | 10            | 11           | 12            |

## 2.3 References

References must be numbered consecutively in square brackets [1] as they are cited. Multiple citations should be separated by commas [2], [3].

All references should be collected at the end of the paper. List all authors when there are six or fewer; when there are seven or more, list the first one, followed by “et al.” When citing internet addresses it is important to include the access date as well as the URL.

Please use the **IEEE style** for the reference list.

## 3 Manuscript processing

The **evaluation process** varies from journal to journal.

In *Nanophotonics* the peer-review process is single-blind, which means that the reviewers remain anonymous to the authors. The journal’s standard policy requires each paper to be reviewed by at least two independent experts. The manuscript is then either accepted, rejected, or returned for revision based on their evaluation.

Authors are requested to suggest persons competent to review their manuscript. However, it is at the editors’ discretion whether to accept these proposals.

**Galley proofs:** Before your contribution is published, you will receive a proof of the article to proof-read. At this point in the publication process, there must be no more changes made to the content: only minor corrections in form and phrasing are possible.

## 4 Author statements

Manuscripts must follow certain ethical guidelines to be considered for publication. These can generally be found in De Gruyter’s Publication Ethics and Malpractice Statement. Before submitting your manuscript, please make sure that you and your co-authors agree to the applicable requirements. Furthermore, our Code of Conduct for Publication Procedures and Ethics defines the responsibility of De Gruyter as a publisher and the Editors we work with, to ensure the legitimacy and quality of our published research. Our principles are based on the guidelines of the Committee on Publication Ethics (COPE).

Please ensure the following statements relating to publication ethics are included in your article. These should appear at the end of your article, before your references.

- Acknowledgements
- Research Funding Statement
- Author Contributions Statement
- Conflict of Interest Statement
- Informed Consent Statement
- Ethical Approval (following specific guidelines for any research involving humans or animals)
- Data Availability Statement

Please refer to the guidance in the Instruction for Authors when preparing your statements. All statements should be posted in a separate document submitted along with the manuscript in the online system. Please refer to the author statement template.

**Acknowledgment:** (*if applicable*) Please insert acknowledgments of the assistance of colleagues or similar notes of appreciation here.

**Research funding:** (*mandatory*) Please insert information concerning research grant support here (institution and grant number). Please provide for each funder the funder's DOI according to the Crossref Funder Registry.

**Author contributions:** (*mandatory*) **Authorship** should be limited to those who have made a significant contribution to the conception, design, execution, or interpretation of the reported study. All those who have made significant contributions should be listed as co-authors. Where there are others who have participated in certain substantive aspects of the research project, they should be named in the Acknowledgement section. The corresponding author should ensure that all appropriate co-authors (according to the above definition) and no inappropriate co-authors are included in the author list of the manuscript and that all co-authors have seen and approved the final version of the paper and have agreed to its submission for publication.

Only one **Corresponding Author** can be indicated in the online submission system. Upon acceptance, authors can nominate up to one additional Corresponding author from the existing author list. This must be communicated to the Journal Coordinator promptly as changes cannot be made after publication.

For more details on author roles, please visit <https://www.degruyter.com/publishing/for-authors/for-journal-authors/role-of-authors>.

**For multi-authored publications**, authors should add an "Author contribution" section. This section should contain the following information: - Acknowledgement that all authors accepted the responsibility for the content of the manuscript and consented to its submission, reviewed all the results, and approved the final version of the manuscript. - Brief description of the contribution of all co-authors, with the authors referred to using their initials. If required by the funding bodies, the authors may add further information describing the degree of each author's contribution.

Example: **Author contribution:** *All authors have accepted responsibility for the entire content of this manuscript and consented to its submission to the journal, reviewed all the results and approved the final*

*version of the manuscript. IGH and JB designed the experiments and CC carried them out. HD developed the model code and performed the simulations. AA prepared the manuscript with contributions from all co-authors.*

**For single-authored publications**, authors should add an "Author contribution" section stating they confirm the sole responsibility for the conception of the study, presented results, and manuscript preparation.

Example: **Author contribution:** *The author confirms the sole responsibility for the conception of the study, presented results and manuscript preparation.*

**Conflict of interest:** (*mandatory*) If you do not have a statement to make, please insert the default statement '*Authors state no conflict of interest.*'

**Informed consent:** (*if applicable*) The following (or similar) statement should appear in your informed consent statement: '*Informed consent was obtained from all individuals included in this study.*'

**Ethical approval:** (*if applicable*) (Following specific guidelines for any research involving humans or animals.)

**Manuscripts that contain information on the use of humans** should clearly state that the research complies with all relevant national regulations and institutional policies and has been approved by the authors' Institutional Review Board or any equivalent Committee. The Editors reserve the right to seek additional information or guidance from reviewers on any cases in which concerns arise.

The following (or similar) statement should be included in your Ethical Approval statement: *The research related to human use has been complied with all the relevant national regulations, institutional policies and in accordance the tenets of the Helsinki Declaration, and has been approved by the authors' Institutional Review Board or equivalent Committee.* Detailed information should be provided (IRB name, IRB approval date and ID).

**Manuscripts that contain information on the use of animals** should clearly state that the research has complied with all relevant national regulations and institutional policies and has been approved by the authors' Institutional Review Board or any equivalent Committee. The Editors reserve the right to seek additional information or guidance from reviewers on any cases in which concerns arise. The research using animal subjects should be conducted according to

the Principles of Laboratory Animal Care and similar documents (e.g. [NIH](#)). For manuscripts reporting experiments on live vertebrates or higher invertebrates, authors must identify the Committee approving the experiments, and must confirm that all experiments were performed in accordance with relevant regulations.

The following (or similar) statement should appear in your Ethics Statement: *The research related to animals use has been complied with all the relevant national regulations and institutional policies for the care and use of animals.* Detailed information should be provided (IRB name, IRB approval date and ID). For research involving wildlife in natural settings, authors must have obtained an Institutional Animal Care approval and state that they have complied with the relevant national, international, and institutional guidelines regarding the ethical treatment of the taxa of study and cite them.

**Data availability statement:** (*mandatory*) By publishing in the journal, authors are required to provide a data availability statement (DAS) in their article. The DAS confirms the presence or absence of shared data. The DAS should include information on where the data supporting the findings reported in the article can be found, including, if applicable, hyperlinks to publicly archived datasets analysed or generated during the study. If research data are not publicly available, this must be stated in the manuscript, as well as the conditions for accessing the data.

Authors are encouraged to share their data but are not required to do so. The decision to publish will not be affected by whether or not authors share their research data.

The DAS should be included before the references (at the end of the Author Statements) and can take one of the following forms (or a combination of more than one if required for multiple types of research data):

- *The datasets generated during and/or analyzed during the current study are available in the [NAME] repository, [PERSISTENT WEB LINK TO DATASETS].*
- *The datasets generated during and/or analyzed during the current study are available from the corresponding author on reasonable request.*
- *Data sharing is not applicable to this article as no datasets were generated or analyzed during the current study.*
- *All data generated or analyzed during this study are included in this published article [and its supplementary information files].*

- *The data that support the findings of this study are available from [third party name] but restrictions apply to the availability of these data, which were used under license for the current study, and so are not publicly available. Data are however available from the authors upon reasonable request and with permission of [third party name].*

## References

- [1] L. Novotny and B. Hecht, *Principles of Nano-Optics*, 2 ed., Cambridge, England: Cambridge University Press, 2012.
- [2] R. K. Andrews, M. C. Berndt, and J. A. López, "The glycoprotein Ib-IX-V complex," in *Platelets*, A. Michelson, Ed., 2nd ed., San Diego, CA, USA: Academic Press, 2006, pp. 145-163.
- [3] A. Schirato, M. Maiuri, G. Cerullo, and G. Della Valle, "Ultrafast hot electron dynamics in plasmonic nanostructures: experiments, modelling, design," *Nanophotonics*, vol. 12, no. 1, pp. 1-28, 2023, <https://doi.org/10.1515/nanoph-2022-0592>.
- [4] E. P. Wigner, "On a modification of the Rayleigh-Schrodinger perturbation theory," (in German), *Math. Naturwiss. Anz. Ungar. Akad. Wiss.*, vol. 53, p. 475, 1935.
- [5] R. Ota and S. Uenoyama, "Plasmonic ultraviolet filter for fast-timing applications," *Nanophotonics*, 2023, <https://doi.org/10.1515/nanoph-2022-0704>.
- [6] T. Ferreira de Lima, et al., "Design automation of photonic resonator weights," *Nanophotonics*, to be published.
- [7] T. Dubcek, et al., "Binary classification of spoken words with passive elastic metastructures," 2021, arXiv:2111.08503.
- [8] O. Fesenko and L. Yatsenko, "Nanophotonics, Nanooptics, Nanobiotechnology and Their Applications," *Proc. 6th Int. Conf. Nanotechnol*, 2019, <https://doi.org/10.1007/978-3-030-17755-3>.
- [9] A. Pozio and S. Galli, "The role of hydrogen from electrolysis in the overproduction of energy from renewable sources," 2022 IOP Conf. Ser.: Mater. Sci. Eng., vol. 1265, 2022.
- [10] P. Bhandari, "Nominal data | Definition, examples, data collection & analysis," Scribbr, <https://www.scribbr.com/statistics/nominal-data/> (retrieved Aug. 11, 2022).
- [11] J. P. Wilkinson, "Nonlinear resonant circuit devices," U.S. Patent 3 624 125, Jul. 16, 1990.
- [12] *Frequency Response and Bias*, NERC Reliability Standard BAL-003-0.1b, May, 2009
- [13] N. Kawasaki, "Parametric study of thermal and chemical nonequilibrium nozzle flow," M.S. thesis, Dept. Electron. Eng., Osaka Univ., Osaka, Japan, 1993.
- [14] E. E. Reber, R. L. Michell, and C. J. Carter, "Oxygen absorption in the earth's atmosphere," Aerospace Corp., Los Angeles, CA, USA, Tech. Rep. TR-0200 (4230-46)-3, Nov., 1988.
- [15] S. Urazhdin, N. O. Birge, W. P. Pratt Jr., and J. Bass, "Current-driven magnetic excitations in permalloybased multilayer nanopyllars," 2003. [Online]. Available: arXiv:cond-mat/0303149.
