# Supplementary material
Source: publisher site journal article supplement (https://www.degruyterbrill.com/publication/journal_key/NANOPH/downloadAsset/NANOPH_LaTeX_Article_Template.zip)

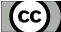

BY

Supplement: Supplementary file 2 [file NANOPH_LaTeX_Article_Template.zip]
